# Supplementary material
Source: Springer Nature journal article supplement (https://www.springermedizin.de/resource/supplementary/12885_2013_4292_MOESM5_ESM.pdf/9467640)

**A**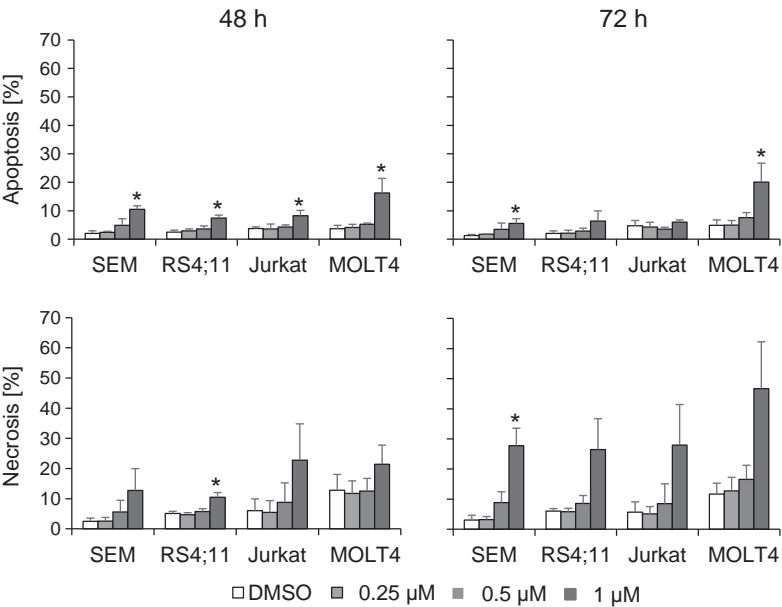**B**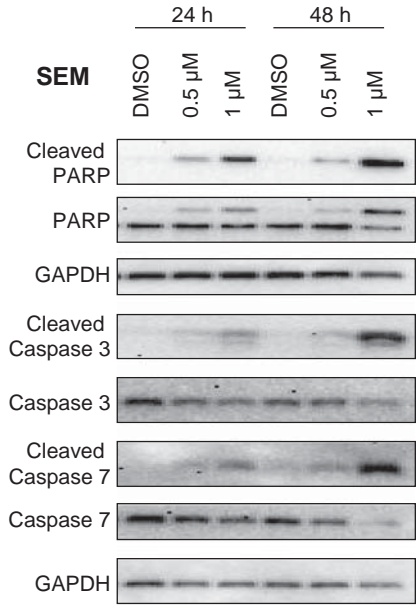

Supplement: MOESM5 [file 9467640]
